# Supplementary material for: Electrospun Poly(methyl methacrylate)/TiO2 Composites for Photocatalytic Water Treatment
Source: MDPI journal article supplement (doi:10.3390/polym13223923), 2021-11-13
Supplement: s1 [file s1]

## Supplementary material

# Electrospun Poly(methyl methacrylate)/TiO<sub>2</sub> Composites for Photocatalytic Water Treatment

Olya Stoilova \*, Nevena Manolova, and Iliya Rashkov

Laboratory of Bioactive Polymers, Institute of Polymers, Bulgarian Academy of Sciences, Acad. G. Bonchev St., bl. 103A, BG-1113 Sofia, Bulgaria; stoilova@polymer.bas.bg; manolova@polymer.bas.bg (N.M.); rashkov@polymer.bas.bg (I.R.)

\* Correspondence stoilova@polymer.bas.bg

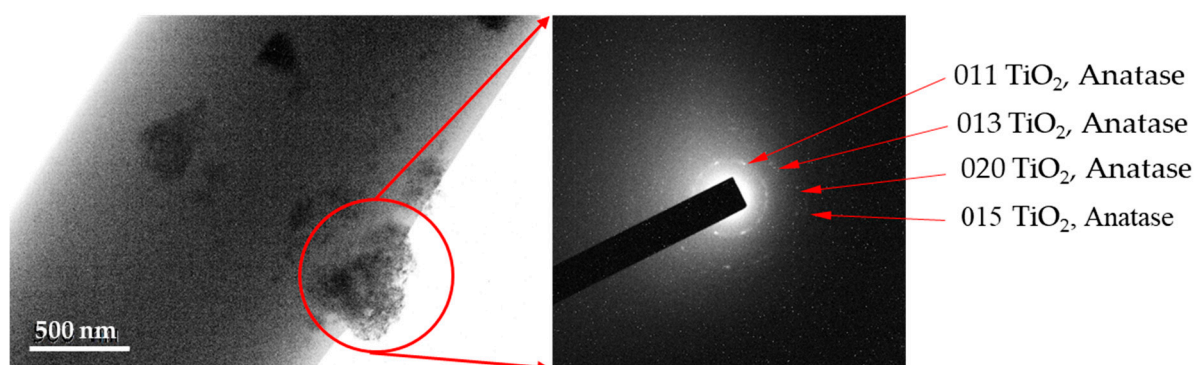

**Figure S1.** TEM micrograph and SAED patterns of the PMMA/5TiO<sub>2</sub> composites.
